# Supplementary material for: Optimization of metal–organic (citric acid) frameworks for controlled release of nutrients
Source: Royal Society of Chemistry journal article supplement (doi:10.1039/c9ra06939a), 2019-01-01
Supplement: c9ra06939a1.pdf [file c9ra06939a1.pdf]

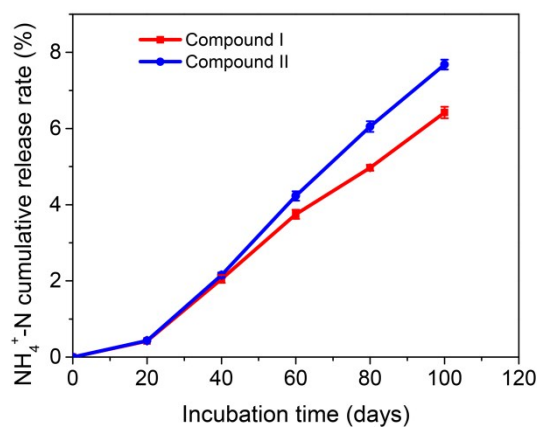

**Fig. S1**  $\text{NH}_4^+\text{-N}$  cumulative release rate of compounds in water

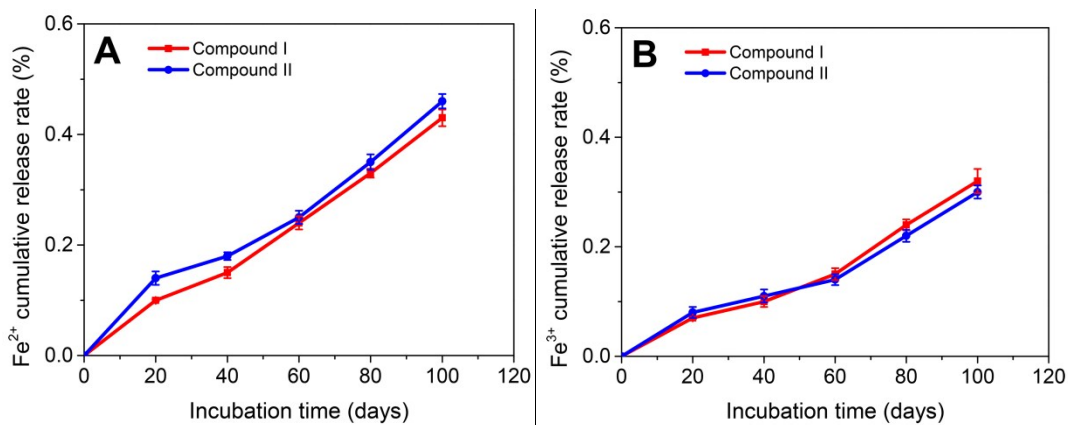

**Fig. S2**  $\text{Fe}^{2+}$  (A) and  $\text{Fe}^{3+}$  (B) cumulative release rates of compounds in water
